# Supplementary material for: The Impact of the No Jab No Play and No Jab No Pay Legislation in Australia: A Scoping Review
Source: MDPI journal article supplement (doi:10.3390/ijerph20136219), 2023-06-24
Supplement: s1 [file s1]

**Supplementary Table S1.** Characteristics of included studies.

| Authors, Year, Location                                                            | Sample                                                                                                                                                                                                                                                  | Method                                                                                                                                                                                                                          | Legislation Evaluated           | Key Findings                                                                                                                                                                                                                                                                                                                                                                                                                                                                                                                                                                                                                                                                                                                                                                                                                                                                                                                                                                                                                                                                                                                                                                                                                                                                                                                                                                                                                                                                                                                                                                                                                                                                                                                                                                                                                                                                                                                                                                                                                                                                                                                |
|------------------------------------------------------------------------------------|---------------------------------------------------------------------------------------------------------------------------------------------------------------------------------------------------------------------------------------------------------|---------------------------------------------------------------------------------------------------------------------------------------------------------------------------------------------------------------------------------|---------------------------------|-----------------------------------------------------------------------------------------------------------------------------------------------------------------------------------------------------------------------------------------------------------------------------------------------------------------------------------------------------------------------------------------------------------------------------------------------------------------------------------------------------------------------------------------------------------------------------------------------------------------------------------------------------------------------------------------------------------------------------------------------------------------------------------------------------------------------------------------------------------------------------------------------------------------------------------------------------------------------------------------------------------------------------------------------------------------------------------------------------------------------------------------------------------------------------------------------------------------------------------------------------------------------------------------------------------------------------------------------------------------------------------------------------------------------------------------------------------------------------------------------------------------------------------------------------------------------------------------------------------------------------------------------------------------------------------------------------------------------------------------------------------------------------------------------------------------------------------------------------------------------------------------------------------------------------------------------------------------------------------------------------------------------------------------------------------------------------------------------------------------------------|
| Armiento et al. (2020)<br><br>Melbourne, Victoria; Royal Children's Hospital (RCH) | (Parent/guardian and clinicians of children attending the Specialist Immunisation Clinic (SIC) and the Immunisation Drop in Clinic (DIC) at Royal Children's Hospital, Melbourne (RCH))<br><br>607 participants included: 395 from DIC and 214 from SIC | Three surveys:<br>SIC Parent<br>SIC Physician<br>DIC Parent<br><br>(SIC included parent and physician survey for each child)<br><br>Australian Immunisation Register (AIR) data (baseline and 7 months after clinic attendance) | No Jab No Pay<br>No Jab No Play | <ul style="list-style-type: none"> <li>• Motivation to attend services due to policies at nurse-led immunisation drop-in Centre (DIC) or physician-led Specialist Immunisation Clinic (SIC): <ul style="list-style-type: none"> <li>⇒ No Jab No Pay = 2%</li> <li>⇒ No Jab, No Play = 2%</li> <li>⇒ Both NJNPay and NJNPlay = 8%</li> </ul> </li> <li>• Introduction of policies significantly motivated more vaccine hesitant parents (16%) compared to accepting parents (6%) with a difference of 26% (CI 16.6–34.4, <math>p &lt; 0.001</math>).</li> <li>• No Jab, No Play was slightly more influential in motivative parents to attend the clinics (8-9%) than No Jab No Pay (5-6%).</li> <li>• Among parents of under-vaccinated children who planned to catch up their child's vaccine to enrol them in childcare and/or kindergarten <ul style="list-style-type: none"> <li>⇒ 89% vaccine accepting parents</li> <li>⇒ 50% vaccine hesitant parents</li> <li>⇒ 26% planning to seek medical exemption</li> <li>⇒ 24% not planning to enrol their child.</li> </ul> </li> <li>• Baseline <ul style="list-style-type: none"> <li>Fully vaccinated = 64% (&lt;19mths = 74%; ≥19mths = 50%)</li> <li>Partially vaccinated = 34% (&lt;19mths = 23%; ≥19mths = 49%)</li> <li>Unvaccinated = 2% (&lt;19mths = 3%; ≥19mths = 1%)</li> </ul> </li> <li>• One month post clinic attendance <ul style="list-style-type: none"> <li>⇒ Fully vaccination = 72% (&lt;19mths = 80%; ≥19mths = 61%)</li> <li>⇒ Partially vaccinated = 27% (&lt;19mths = 19%; ≥19mths = 39%)</li> <li>⇒ Unvaccinated = 0.5% (&lt;19mths = 1%; ≥19mths = 0%)</li> </ul> </li> <li>• Seven-month post clinic attendance <ul style="list-style-type: none"> <li>Fully vaccinated = 68% (&lt;19mths = 73%; ≥19mths = 61%)</li> <li>Partially vaccinated = 32% (&lt;19mths = 27%; ≥19mths = 39%)</li> <li>Unvaccinated = 0% (&lt;19mths = 0%; ≥19mths = 0%)</li> </ul> </li> <li>• Compared to baseline, full vaccination rates were higher for 1 month post attendance for parent motivated by the policies (40%) or vaccine hesitant (35%).</li> </ul> |

|                                                                           |                                                                                                                                                                                                                                                                                                                                                                                                                                |                                                                                                                                        |                                         |                                                                                                                                                                                                                                                                                                                                                                                                                                                                                                                                                                                                                                                                                                                                                                                                                                                                                                                                                                                                                                                                                                                 |
|---------------------------------------------------------------------------|--------------------------------------------------------------------------------------------------------------------------------------------------------------------------------------------------------------------------------------------------------------------------------------------------------------------------------------------------------------------------------------------------------------------------------|----------------------------------------------------------------------------------------------------------------------------------------|-----------------------------------------|-----------------------------------------------------------------------------------------------------------------------------------------------------------------------------------------------------------------------------------------------------------------------------------------------------------------------------------------------------------------------------------------------------------------------------------------------------------------------------------------------------------------------------------------------------------------------------------------------------------------------------------------------------------------------------------------------------------------------------------------------------------------------------------------------------------------------------------------------------------------------------------------------------------------------------------------------------------------------------------------------------------------------------------------------------------------------------------------------------------------|
| <p>Attwell et al. (2020)</p> <p>Australia (National data)</p>             | <p>Australian Immunisation Register (AIR) data for children ages 12, 24 and 60 months</p> <p>Deidentified AIR data 31 March, 2019 covering the period 2009-2017 for children ages 12, 24 and 60 months</p>                                                                                                                                                                                                                     | <p>Time-series analysis</p>                                                                                                            | <p>No Jab No Pay<br/>No Jab No Play</p> | <ul style="list-style-type: none"> <li>• Due to changes to coverage assessment for full coverage at 24 months it was not possible to test for policy-related changes for this age group.</li> <li>• Rates of children not fully vaccinated at 12 months and 5 years steadily declined from 2009 to 2017</li> <li>• In all states/territories there was a larger annual rate of decrease of 12 months and 5-year old's not fully vaccinated after policy intervention, however this was not significant</li> <li>• However, for New South Wales, vaccine coverage rates were static prior to policy intervention, but reflected an annual increase in coverage rates of 1.25% after policy implementation (<math>p = 0.001</math>).</li> <li>• The impact of the policies was indistinguishable between communities with high, medium and low numbers of registered vaccine refusers.</li> <li>• Difficult to discern specific policy impact with the implementation of the Federal NJNPay policy in 2016 and staggered implementation of NJNPlay (e.g. NSW, 2014; Victoria 2016)</li> </ul>                     |
| <p>Centre for Evaluation and Research Evidence (2020)</p> <p>Victoria</p> | <p>AIR data (2013-20)</p> <p>Department of Education and Training data (2013-20)</p> <p>Kindergarten Information Management System and Victorian Child and Adolescent Monitoring System quantitative data (n = 1,062 surveys)</p> <p>– parent/carer survey (n = 440)</p> <p>– immunisation provider survey (n = 266)</p> <p>– early childhood education and care service provider survey (n = 356)</p> <p>Qualitative data</p> | <p>Mixed methods:</p> <p>Document analysis</p> <p>Literature review</p> <p>Analysis of data-bases</p> <p>Surveys</p> <p>Interviews</p> | <p>No Jab No Play</p>                   | <ul style="list-style-type: none"> <li>• Increase in immunisation rate since introduction of the No Jab No Play legislation in Victoria (2016) <ul style="list-style-type: none"> <li>⇒ 1 year old = 3.4%</li> <li>⇒ 2 year old = 3.7%</li> <li>⇒ 5 year old = 3.3%</li> </ul> </li> <li>• Healthcare providers (84%) acknowledged that legislation led to increased vaccine uptake.</li> <li>• Vaccine hesitant parents: <ul style="list-style-type: none"> <li>⇒ Influenced by the legislation and peak increase in vaccination rate observed when legislation was introduced.</li> <li>⇒ Immunisation providers (74%) reported that reputable and accurate information to be provided to parents/carers with vaccine safety concerns.</li> </ul> </li> <li>• Aboriginal and Torres Strait Islander Immunisation coverage high and exceeded the target for 1-year-old (96.8 per cent) and 5-year-olds (97.9 per cent) Immunisation rates for Aboriginal and Torres Strait Islander children aged 2 years is steadily increasing and is 92.6 per cent, but still 2.4 per cent below the target rate</li> </ul> |

|                                                                                          |                                                                                                                                                                                                                                                                                                                                                                          |                                                                                                                                                                                            |               |                                                                                                                                                                                                                                                                                                                                                                                                                                                                                                                                                                                                                                                                                                                                                                                                                                                                                                                                                                                                                                                                                                   |
|------------------------------------------------------------------------------------------|--------------------------------------------------------------------------------------------------------------------------------------------------------------------------------------------------------------------------------------------------------------------------------------------------------------------------------------------------------------------------|--------------------------------------------------------------------------------------------------------------------------------------------------------------------------------------------|---------------|---------------------------------------------------------------------------------------------------------------------------------------------------------------------------------------------------------------------------------------------------------------------------------------------------------------------------------------------------------------------------------------------------------------------------------------------------------------------------------------------------------------------------------------------------------------------------------------------------------------------------------------------------------------------------------------------------------------------------------------------------------------------------------------------------------------------------------------------------------------------------------------------------------------------------------------------------------------------------------------------------------------------------------------------------------------------------------------------------|
|                                                                                          | <ul style="list-style-type: none"> <li>– key informant interviews (n = 43)</li> <li>– parents and carers, ECECS providers, immunisation providers, immunisation and education experts, peak bodies, migrant services, and Aboriginal community-controlled organisations</li> <li>– written submissions (n = 9) key stakeholder organisations and peak bodies.</li> </ul> |                                                                                                                                                                                            |               |                                                                                                                                                                                                                                                                                                                                                                                                                                                                                                                                                                                                                                                                                                                                                                                                                                                                                                                                                                                                                                                                                                   |
| <p>Cordingley et al. (2021)</p> <p>New South Wales (one rural medical practice data)</p> | <p>All patients aged 21 months to ≤ 19 years at the practice who received a national immunisation program (NIP) vaccination between 2012-17 (cohort: n = 6,422; n = 2,133 NIP vaccine records; n = 453 catch up vaccinations)</p>                                                                                                                                        | <p>Retrospective clinical audit: single medical practice</p> <p>Data collected 9<sup>th</sup> January 2018</p> <p>Vaccinations considered overdue if given 3 months after the due date</p> | No Jab No Pay | <ul style="list-style-type: none"> <li>• Focused on the impact of NJNPay on catch-up vaccinations.</li> <li>• Incidence of annual catch-up vaccinations for the year 2012 – 2015 was on average 6.2% pre-policy implementation.</li> <li>• An increase from 6.2% to 9.2% in 2016 (p &lt; .001) and 7.8% in 2017 (p = .027) was observed post-policy implementation.</li> <li>• Age as a secondary outcome measurement of catch-up vaccination incidence rates before policy implementation showed statistically significant: <ul style="list-style-type: none"> <li>⇒ increases for children: <ul style="list-style-type: none"> <li>8–11 years (3.2%–5.6%, p = .038)</li> <li>12–15 years (7.5%–14.7%, p &lt; .001)</li> <li>16–19 years (3.3%–10.2%, p &lt; .001)</li> </ul> </li> <li>⇒ reduction in children aged 1–3 years (11.4%–6.2%, p = .015)</li> </ul> </li> <li>• Vaccination type as a secondary outcome measurement of catch-up vaccination incidence rates before policy implementation showed statistically significant catch-up rates for DTPa (1.6%-2.4%, p = 0.022)</li> </ul> |
| <p>Frawley et al. (2018)</p> <p>Australia</p>                                            | <p>Australian parents with at least one child &lt;6 years</p> <p>N= 429</p>                                                                                                                                                                                                                                                                                              | <p>Cross- sectional survey: Online, self complete</p>                                                                                                                                      | No Jab No Pay | <ul style="list-style-type: none"> <li>• Influence of information sources on vaccination. <ul style="list-style-type: none"> <li>⇒ GPs (78.3%), friends/family (55.7%), nurses/midwives (43.4%), government websites (33.3%), paediatricians (30.5%), parenting groups (16.8%), non-government websites (13.1%), newspapers/magazines (8.4%), CM-practitioners (6.3%) and pharmacists (4.4%)</li> <li>⇒ Significant relationship between vaccine uptake and being influenced by a paediatrician (p = .001) or GP (p = .019).</li> </ul> </li> </ul>                                                                                                                                                                                                                                                                                                                                                                                                                                                                                                                                               |

|                                                                                |                                                                                          |                                                                                                                                                  |               |                                                                                                                                                                                                                                                                                                                                                                                                                                                                                                                                                                                                                                                                                                                                                                                                                                                                                                                                                                                                                                                                                                                                                                                                                           |
|--------------------------------------------------------------------------------|------------------------------------------------------------------------------------------|--------------------------------------------------------------------------------------------------------------------------------------------------|---------------|---------------------------------------------------------------------------------------------------------------------------------------------------------------------------------------------------------------------------------------------------------------------------------------------------------------------------------------------------------------------------------------------------------------------------------------------------------------------------------------------------------------------------------------------------------------------------------------------------------------------------------------------------------------------------------------------------------------------------------------------------------------------------------------------------------------------------------------------------------------------------------------------------------------------------------------------------------------------------------------------------------------------------------------------------------------------------------------------------------------------------------------------------------------------------------------------------------------------------|
|                                                                                |                                                                                          |                                                                                                                                                  |               | <p>⇒ significant relationship between child vaccination status not being up-to-date and being influenced by a CM-practitioner (<math>p &lt; .001</math>), non-government website (<math>p = .002</math>) or information source other than those listed (<math>p &lt; .001</math>).</p> <ul style="list-style-type: none"> <li>• Introduction of NJNPay and influences on parents' decision to vaccinate <ul style="list-style-type: none"> <li>⇒ 2.6% of parents had their child immunised</li> <li>⇒ 3.9% stated had no effect</li> <li>⇒ 1.2% said it had made them less likely to vaccinate</li> <li>⇒ 1.2% of parents stated they are considering vaccination due to the legislation.</li> </ul> </li> </ul>                                                                                                                                                                                                                                                                                                                                                                                                                                                                                                          |
| <p>Helps, Leask &amp; Barclay (2018)</p> <p>New South Wales (Bryon Region)</p> | Non-vaccinating parents (n = 31)                                                         | Qualitative: semi-structured face-to-face interviews                                                                                             | No Jab No Pay | <ul style="list-style-type: none"> <li>• Impact of legislative changes on families was minimum due to: <ul style="list-style-type: none"> <li>⇒ Ineligibility based on income</li> <li>⇒ their choice not to receive government payments for which they were eligible and/or</li> <li>⇒ low utilisation of childcare services</li> </ul> </li> <li>• Strategies suggested by families who are currently, or expecting to be, affected by the inability to lodge exemptions and receive family tax benefits and childcare subsidies include: <ul style="list-style-type: none"> <li>⇒ increasing extended family support</li> <li>⇒ reducing work and study commitments</li> <li>⇒ informal childcare arrangements, house sharing or relocating to reduce rental burden</li> <li>⇒ withdrawal of children from childcare, including before and after school care services.</li> </ul> </li> <li>• Participants reported that the government measure would not change their mind about vaccinating their children.</li> <li>• Concerns were expressed about further punitive for those declining vaccination and home schooling or accessing education outside the mainstream system were reported as solutions.</li> </ul> |
| <p>Hull et al. (2020)</p> <p>Australia (National data)</p>                     | Participants: AIR data for children 5 to <7 years; 7 to <10 years; 10 years to <20 years | <b>Cross sectional</b> analysis of AIR data on catch-up vaccination<br>AIR data from 1 January 2013-31 December 2014 (baseline, prior to NJNPay) | No Jab No Pay | <ul style="list-style-type: none"> <li>• NJNPay and catch-up vaccination explored</li> <li>• Ages 5 to less than 7 years: <ul style="list-style-type: none"> <li>⇒ Proportion of DTPa3 catch-up vaccination after introduction of No Jab No Pay was 15.5% (3,366 of 35,673 unvaccinated children) indicating an increase from 9.4% at baseline.</li> </ul> </li> </ul>                                                                                                                                                                                                                                                                                                                                                                                                                                                                                                                                                                                                                                                                                                                                                                                                                                                    |

|                                                            |                                                                                                                                                          |                                                                                                                                                                                                                                                                                                                                                                                                                                                                                                                                     |                                            |                                                                                                                                                                                                                                                                                                                                                                                                                                                                                                                                                                                                                                                                                                                                                                                                                                                                                                                                                                                                                                                                                                                                 |
|------------------------------------------------------------|----------------------------------------------------------------------------------------------------------------------------------------------------------|-------------------------------------------------------------------------------------------------------------------------------------------------------------------------------------------------------------------------------------------------------------------------------------------------------------------------------------------------------------------------------------------------------------------------------------------------------------------------------------------------------------------------------------|--------------------------------------------|---------------------------------------------------------------------------------------------------------------------------------------------------------------------------------------------------------------------------------------------------------------------------------------------------------------------------------------------------------------------------------------------------------------------------------------------------------------------------------------------------------------------------------------------------------------------------------------------------------------------------------------------------------------------------------------------------------------------------------------------------------------------------------------------------------------------------------------------------------------------------------------------------------------------------------------------------------------------------------------------------------------------------------------------------------------------------------------------------------------------------------|
|                                                            |                                                                                                                                                          | <p>and 1 December 2015- 31 December 2017</p> <p>Analyse catch-up vaccination rate for third dose of DTPa3 and first dose of MMR1at baseline. Catch-up for selected vaccination at 5 to less than 7 years; 7 to less than 10 years and 10 to less than 20 years. MMR2 catch-up vaccinations by socio-economic status; Indigenous status and geographic characteristics. Analyses conducted by age group, geographical location (remote or metropolitan), socio-economic status and Aboriginal and Torres Strait Islander status.</p> |                                            | <p>⇒ Lower catch-up rates in remote (18.3%) and regional (21.5%) compared to metro areas (22.7%).</p> <ul style="list-style-type: none"> <li>• Ages 7 to less than 10 years: <ul style="list-style-type: none"> <li>⇒ 22.3% received MMR2 and 12.5% received DTPa3 vaccination catch up during first two years of No Jab No Pay.</li> <li>⇒ Greater increase for those with lowest socio-economic status (32.3%) compared to highest status areas (14.6%).</li> <li>⇒ Greater increase indigenous (43.4%) compared to non-indigenous Australians (21.9%).</li> </ul> </li> <li>• Ages 10 to less than 20 years: <ul style="list-style-type: none"> <li>⇒ 17.6% received MMR2 and 8.8% received dTpa3 vaccination catch up during first two years of No Jab No Pay.</li> <li>⇒ Greater increase for those with lowest socio-economic status (29.1%) compared to highest status areas (7.6%).</li> <li>⇒ Greater increase indigenous (35.8%) compared to non-indigenous Australians (17.1%).</li> <li>⇒ Lower catch-up rates in remote (15.8%) and metro areas (17.1%) compared to regional (19.5%) areas.</li> </ul> </li> </ul> |
| <p>Li and Toll (2021)</p> <p>Australia (National data)</p> | <p>AIR data for children aged &lt;= 6 years</p>                                                                                                          | <p>Generalised linear models on data 2014-2018 Statistical Area 3</p>                                                                                                                                                                                                                                                                                                                                                                                                                                                               | <p>No Jab No Pay</p> <p>No Jab No Play</p> | <ul style="list-style-type: none"> <li>• Removal of philosophical or religious exemptions was associated with increases in vaccine coverage: <ul style="list-style-type: none"> <li>⇒ Approx. 2-4% increase for one years;</li> <li>⇒ Approx. 1-1.5% increase for two years;</li> <li>⇒ Approx. 1-3.5% increase for five years</li> </ul> </li> </ul> <p>Greater improvement in coverage was found in areas with greater socioeconomic disadvantage, lower median income, more benefit dependency, and higher pre-policy baseline coverage</p>                                                                                                                                                                                                                                                                                                                                                                                                                                                                                                                                                                                  |
| <p>Toll and Li (2022)</p> <p>Australia (National data)</p> | <p>AIR data (1-, 2-, 5-year-olds), linked to regional characteristics from the Australian Bureau of Statistics at the statistical area 3 (SA3) level</p> | <p>Data compared between January 2016 and December 2019</p> <p>Intervention and control and before and after study design</p>                                                                                                                                                                                                                                                                                                                                                                                                       | <p>No Jab No Play</p>                      | <ul style="list-style-type: none"> <li>• Increases in coverage significant, however small at around 1% across age groups</li> <li>• Increases greater for 2-and 5-year-olds</li> <li>• Considering aggregate time trends and regional characteristics improvement in full coverage post year 1 and 2 of policy implementation: <ul style="list-style-type: none"> <li>• Age one (post-year 1: 0.15%; post-year 2: 0.56%)</li> <li>• Age two (post-year 1: 0.49%; post-year 2: 1.15%)</li> </ul> </li> </ul>                                                                                                                                                                                                                                                                                                                                                                                                                                                                                                                                                                                                                     |

|                                             |                                                     |                                                                                                                                                                                                                                                                                                                                                                                                      |                      |                                                                                                                                                                                                                                                                                                                                                                                                                                                                                                                                                                                                                                                                                                                                                                                                                                                                                                                                                                                                                                                                                                                                                                                                                                                                                                                                                                                                                                                                                                                                                                                   |
|---------------------------------------------|-----------------------------------------------------|------------------------------------------------------------------------------------------------------------------------------------------------------------------------------------------------------------------------------------------------------------------------------------------------------------------------------------------------------------------------------------------------------|----------------------|-----------------------------------------------------------------------------------------------------------------------------------------------------------------------------------------------------------------------------------------------------------------------------------------------------------------------------------------------------------------------------------------------------------------------------------------------------------------------------------------------------------------------------------------------------------------------------------------------------------------------------------------------------------------------------------------------------------------------------------------------------------------------------------------------------------------------------------------------------------------------------------------------------------------------------------------------------------------------------------------------------------------------------------------------------------------------------------------------------------------------------------------------------------------------------------------------------------------------------------------------------------------------------------------------------------------------------------------------------------------------------------------------------------------------------------------------------------------------------------------------------------------------------------------------------------------------------------|
|                                             |                                                     | <p>NSW and WA data were used for the main estimation using a quasi-experimental design. NJNPlay was introduced (without consintious objections) in NSW and WA in 2018 and 2019 respectively.</p> <p>Analysis for Queensland and Victoria where NJNPay and NJNPlay were both implemented in 2016 employed a repeated measures group modelling approach. Other States/Territories acted as control</p> |                      | <ul style="list-style-type: none"> <li>• Age five (post-year 1: 0.38%; post-year 2: 0.71%)</li> <li>• Policy effect was insignificant and dispersed the lowest quantiles of disadvantage</li> <li>• Policy effect was smaller and insignificant in the highest socio-economic areas</li> </ul>                                                                                                                                                                                                                                                                                                                                                                                                                                                                                                                                                                                                                                                                                                                                                                                                                                                                                                                                                                                                                                                                                                                                                                                                                                                                                    |
| <p>Trent et al. (2019)</p> <p>Australia</p> | <p>Parents with children &lt; 5 years (n = 411)</p> | <p>Online survey distributed by Survey Sampling International (SSI)</p> <p>Randomly distributed to SSI panel members to achieve a representative sample in terms of gender and state/territory residence</p>                                                                                                                                                                                         | <p>No Jab No Pay</p> | <ul style="list-style-type: none"> <li>• Support for No Jab No Pay <ul style="list-style-type: none"> <li>⇒ Supportive of the policy (82%)</li> <li>⇒ Females were twice as likely as males to support the policy (OR = 2.14, 95% CI [1.28, 3.61], <math>p &lt; 0.01</math>), but no difference observed after controlling for disease risk perception and needing the financial incentives (AOR 1.62, 95% CI [0.92, 2.84], <math>p = 0.09</math>)</li> <li>⇒ Demographics status such as age, country of birth, education level, Aboriginal/Torres Strait Islander status, or state/territory of residence did not affect the results</li> <li>⇒ No significant difference in supporting the policy observed between those who utilise childcare services compared to those who don't</li> <li>⇒ For parents that reported needing the financial incentive to afford their family expenses, the odds of supporting the policy were more than twice than those who don't (OR = 2.14, 95% CI = [1.24, 3.68], <math>p &lt; 0.001</math>)</li> </ul> </li> <li>• Increased willingness to vaccinate as a result of the legislation 32%</li> <li>• Willingness to vaccinate <ul style="list-style-type: none"> <li>⇒ To reconsider vaccination were more than nine times higher among respondents that reported needing the financial incentives (AOR = 9.66, 95% CI = [4.98, 18.72], <math>p &lt; 0.001</math>).</li> <li>⇒ Parents that reported utilising child care centres or family day care had more than twice the odds of being willing to reconsider</li> </ul> </li> </ul> |

|  |  |  |  |                                                                                                                                                                                                                                                                                                                                                                                                                                                             |
|--|--|--|--|-------------------------------------------------------------------------------------------------------------------------------------------------------------------------------------------------------------------------------------------------------------------------------------------------------------------------------------------------------------------------------------------------------------------------------------------------------------|
|  |  |  |  | <p>vaccination compared to parents that did not (AOR = 2.09, 95% CI = [1.04, 4.17], p = 0.04).</p> <p>⇒ Victoria respondents had higher odds of reconsidering vaccination compared to those from New South Wales and other states (AOR = 2.32, 95% CI = [1.00, 5.38], p = 0.05)</p> <p>⇒ Demographics status such as age, country of birth, education level, Aboriginal/Torres Strait Islander status, or state of residence did not affect the results</p> |
|--|--|--|--|-------------------------------------------------------------------------------------------------------------------------------------------------------------------------------------------------------------------------------------------------------------------------------------------------------------------------------------------------------------------------------------------------------------------------------------------------------------|
